# Supplementary material
Source: publisher figshare collection journal article supplement (https://acs.figshare.com/ndownloader/files/4620814)
Supplement: Supplementary file 1 [file 4620814]

## Supporting Information

*for*

### Identification of Iodine-Induced Morphological Transformation of Gold Nanorods

*Jian Wang<sup>1,2</sup>, Yuan Fang Li<sup>2</sup>, Cheng Zhi Huang<sup>\*,1</sup>*

<sup>1</sup>College of Pharmaceutical Sciences, and <sup>2</sup>College of Chemistry and Chemical Engineering, MOE Key Laboratory on Luminescence and Real-Time Analysis, CQKL-LRTA, Southwest University, Chongqing 400715, PR China

E-mail: chengzhi@swu.edu.cn

#### 1. The synthesis of Au NRs

Au-NRs were prepared according to reference.<sup>1</sup> Firstly, a 10 mL solution of gold seeds were prepared by the reduction of  $\text{HAuCl}_4 \cdot 4\text{H}_2\text{O}$  ( $2.5 \times 10^{-4}$  M) by ice-cold  $\text{NaBH}_4$  ( $9.0 \times 10^{-4}$  M) in the presence of CTAB ( $7.5 \times 10^{-2}$  M). The  $\text{NaBH}_4$  solution was added at a time to the mixed solution and followed by mixing vigorously for about 30s. The mixture rapidly developed into a light-brown color and then was kept for between 2 h and 24 h at 25 °C before synthesis of NRs. The solution was shaken after the addition of every component.

Then, the growth solution, which contained 5.0 mL 0.002 M  $\text{HAuCl}_4 \cdot 4\text{H}_2\text{O}$  and 7.7 mL  $\text{H}_2\text{O}$ , was stirred, then 11.9 mL 0.2 M CTAB was added, the color of the mixed solution quickly changed from light yellow to orange, and then 0.15 mL 0.01 M  $\text{AgNO}_3$  was placed into the growth solution, mixed and followed by adding 0.16 mL 0.1 M L-AA and mixing for about 2 min, the color of solution changed into colorless immediately. Finally, 0.11 mL 2-h aged Au seed solution was added into the growth solution and blended vigorously for 20 s, and the color became red gradually. At last, the mixed solution was left undisturbed for 24 h in the incubator to prevent CTAB from crystal and the growth solution was kept in water bath throughout the procedure.

---

\* Corresponding author. Tel.: +86-23-68254659; fax: +86-23-68866796. E-mail address: chengzhi@swu.edu.cn (C.Z. Huang).

## 2. Tables and Figures

**Table S1** X-ray diffractograms of AuI\*

| $2\theta$ | Int-f | h | k | l |
|-----------|-------|---|---|---|
| 12.885    | 999   | 0 | 0 | 2 |
| 24.202    | 568   | 0 | 0 | 4 |
| 29.741    | 768   | 1 | 1 | 1 |

\*Ref: Jagodzinski, H.; Z. Kristallogr.; Kristallgeom.; Kristallphys.; Kristallchem. 1959, 112, 80

Calculated from ICSD using POWD-12++[1997]

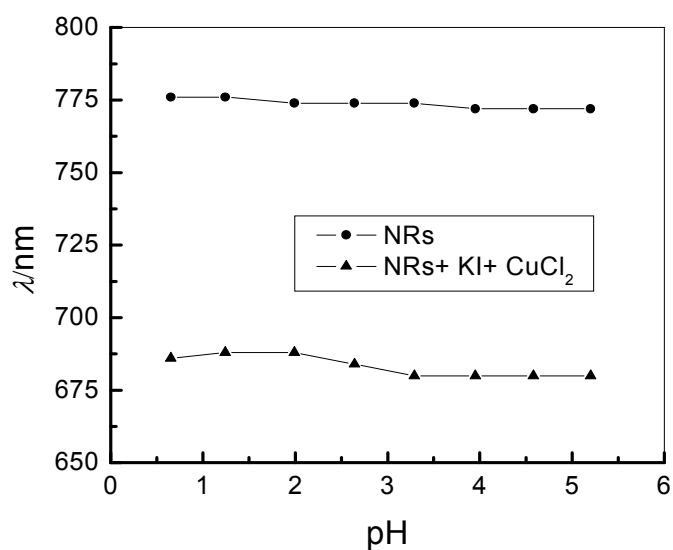

**Figure S2.** The effect of pH on the fusion process of Au-NRs.

$c_{\text{Au-NRs}}, 8.0 \times 10^{-5} \text{ M}; c_{\text{NaCl}}, 0.10 \text{ M}; c_{\text{KI}}, 1.0 \times 10^{-3} \text{ M}; c_{\text{CuCl}_2}, 5.0 \times 10^{-4} \text{ M}.$

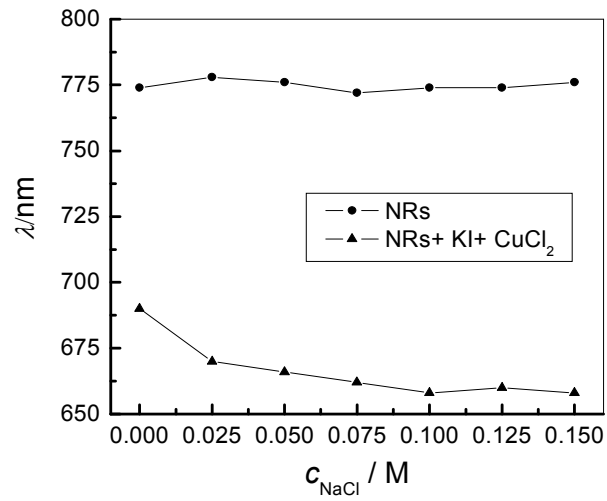

**Figure S2.** The effect of ion strength on the fusion process of Au-NRs.

$c_{\text{Au-NRs}}, 8.0 \times 10^{-5} \text{ M}; c_{\text{KI}}, 1.0 \times 10^{-3} \text{ M}; c_{\text{CuCl}_2}, 5.0 \times 10^{-4} \text{ M}; \text{pH } 3.29.$

### 3. Reference:

- (1) Jiang, X. C.; Brioude, A.; Pileni, M. P. *Colloid. Surface. A* **2006**, 277, 201.
